# Supplementary material for: Dietary Provision, GLIM-Defined Malnutrition and Their Association with Clinical Outcome: Results from the First Decade of nutritionDay in China
Source: MDPI journal article supplement (doi:10.3390/nu16040569), 2024-02-19
Supplement: s1 [file s1]

Supplementary Table S3. Cox regression analysis of 30-day good outcome.

| Variable                      | Category                | Univariate<br>analysis | Model I            | Model II<br>(Including<br>GLIM) | Model III<br>(Including<br>malnutrition<br>diagnosis<br>with nutrition<br>intake) |
|-------------------------------|-------------------------|------------------------|--------------------|---------------------------------|-----------------------------------------------------------------------------------|
|                               |                         | HR [95% CI]            | HR [95% CI]        | HR [95% CI]                     | HR [95% CI]                                                                       |
| <b>Sex</b>                    | Female                  | Reference              | Reference          | Reference                       | Reference                                                                         |
|                               | Male                    | 0.94<br>[0.89-1.00]*   | 0.94 [0.88-0.99]*  | 0.94<br>[0.89-1.00]*            | 0.94 [0.89-1.01]                                                                  |
|                               | Missing                 | 0.78<br>[0.35-1.73]    | 0.54 [0.24-1.21]   | 0.61<br>[0.27-1.37]             | 1.35 [0.55-3.28]                                                                  |
| <b>Age</b>                    | 18-29 years             | Reference              |                    |                                 |                                                                                   |
|                               |                         | 0.96                   |                    |                                 |                                                                                   |
|                               | 30-39 years             | [0.84-1.10]            |                    |                                 |                                                                                   |
|                               |                         | 1.12                   |                    |                                 |                                                                                   |
|                               | 40-49 years             | [0.99-1.27]            |                    |                                 |                                                                                   |
|                               |                         | 1.11                   |                    |                                 |                                                                                   |
|                               | 50-59 years             | [0.99-1.24]            |                    |                                 |                                                                                   |
|                               |                         | 1.08                   |                    |                                 |                                                                                   |
|                               | 60-69 years             | [0.96-1.21]            |                    |                                 |                                                                                   |
|                               |                         | 1.03                   |                    |                                 |                                                                                   |
| <b>BMI, kg/m<sup>2</sup></b>  | 70-79 years             | [0.91-1.17]            |                    |                                 |                                                                                   |
|                               |                         | 0.90                   |                    |                                 |                                                                                   |
|                               | ≥ 80 years              | [0.77-1.05]            |                    |                                 |                                                                                   |
|                               | 18.5-24.9               | Reference              | Reference          |                                 |                                                                                   |
|                               |                         | 0.75                   |                    |                                 |                                                                                   |
|                               | < 18.5                  | [0.69-0.82]***         | 0.86 [0.78-0.95]** |                                 |                                                                                   |
|                               |                         | 1.13                   |                    |                                 |                                                                                   |
| <b>Major lesion<br/>types</b> | 25.0-29.9               | [1.05-1.20]***         | 1.10 [1.03-1.18]** |                                 |                                                                                   |
|                               |                         | 1.15                   |                    |                                 |                                                                                   |
|                               | ≥ 30.0                  | [0.98-1.35]            | 1.10 [0.94-1.30]   |                                 |                                                                                   |
|                               |                         | 1.30                   |                    |                                 |                                                                                   |
|                               | Missing                 | [1.02-1.66]*           | 1.19 [0.92-1.53]   |                                 |                                                                                   |
|                               |                         | 1.11                   |                    |                                 |                                                                                   |
|                               | Cancer                  | [1.00-1.24]            | 0.88 [0.77-1.00]   |                                 |                                                                                   |
|                               |                         | 0.97                   |                    |                                 |                                                                                   |
|                               | Neurological<br>disease | [0.85-1.12]            | 0.94 [0.77-1.14]   |                                 |                                                                                   |
|                               | Digestive<br>disease    | 1.22<br>[1.10-1.35]*** | 0.95 [0.84-1.07]   |                                 |                                                                                   |

|                          |                                         |                |                    |                |                  |
|--------------------------|-----------------------------------------|----------------|--------------------|----------------|------------------|
| <b>Comorbidity</b>       | Endocrine/<br>nutritional/<br>metabolic | 1.05           |                    |                |                  |
|                          | disease                                 | [0.84-1.30]    | 0.75 [0.59-0.96]*  |                |                  |
|                          | Cardiovascular                          | 0.98           |                    |                |                  |
|                          | disease                                 | [0.82-1.18]    | 1.00 [0.82-1.23]   |                |                  |
|                          | Respiratory                             | 1.17           |                    |                |                  |
|                          | disease                                 | [0.96-1.42]    | 1.00 [0.78-1.29]   |                |                  |
|                          | Genitourinary                           | 1.28           |                    |                |                  |
|                          | disease                                 | [1.10-1.50]**  | 0.66 [0.49-0.87]** |                |                  |
|                          | Other                                   | Reference      | Reference          |                |                  |
|                          | Missing                                 | 1.56           | 1.55               |                |                  |
| <b>Previous ICU stay</b> |                                         | [1.36-1.79]*** | [1.23-1.95]***     |                |                  |
|                          | No                                      | Reference      | Reference          |                |                  |
|                          |                                         | 0.84           | 0.85               |                |                  |
|                          | Yes                                     | [0.79-0.89]*** | [0.79-0.91]***     |                |                  |
|                          |                                         | 1.25           |                    |                |                  |
|                          | Missing                                 | [1.13-1.38]*** | 1.05 [0.88-1.26]   |                |                  |
|                          | No                                      | Reference      | Reference          | Reference      | Reference        |
|                          |                                         | 0.86           |                    | 1.03           |                  |
|                          | Yes                                     | [0.79-0.93]*** | 1.00 [0.91-1.10]   | [0.94-1.13]    | 1.01 [0.91-1.12] |
|                          |                                         | 1.03           |                    | 1.01           |                  |
| <b>Mobility</b>          | Missing                                 | [0.84-1.27]    | 1.02 [0.83-1.27]   | [0.82-1.25]    | 1.10 [0.84-1.44] |
|                          | Walk without                            |                |                    |                |                  |
|                          | assistance                              | Reference      | Reference          | Reference      | Reference        |
|                          | Walk with                               | 0.78           |                    | 0.90           | 0.90             |
|                          | assistance                              | [0.71-0.84]*** | 0.90 [0.82-0.98]*  | [0.83-0.98]*   | [0.82-0.99]*     |
|                          |                                         | 0.59           | 0.75               | 0.74           | 0.72             |
|                          | Bedridden                               | [0.53-0.66]*** | [0.66-0.85]***     | [0.65-0.83]*** | [0.62-0.83]***   |
|                          |                                         | 0.93           |                    | 1.01           |                  |
|                          | Missing                                 | [0.82-1.06]    | 1.01 [0.87-1.18]   | [0.87-1.17]    | 1.07 [0.91-1.27] |
|                          | Excellent and                           |                |                    |                |                  |
| <b>Self-rated health</b> | very good                               | 0.92           |                    | 0.92           |                  |
|                          |                                         | [0.82-1.03]    | 0.91 [0.82-1.02]   | [0.82-1.03]    | 0.96 [0.85-1.09] |
|                          | Good                                    | Reference      | Reference          | Reference      | Reference        |
|                          |                                         | 0.81           |                    | 0.89           | 0.89             |
|                          | Fair                                    | [0.76-0.87]*** | 0.91 [0.85-0.97]** | [0.83-0.95]*** | [0.83-0.96]**    |
|                          |                                         | 0.73           |                    | 0.92           |                  |
|                          | Poor and very                           |                |                    |                |                  |
|                          | poor                                    | [0.67-0.80]*** | 0.98 [0.88-1.09]   | [0.83-1.02]    | 0.94 [0.84-1.05] |

|                                           |                      |                        |                        |                        |                        |
|-------------------------------------------|----------------------|------------------------|------------------------|------------------------|------------------------|
| <b>Surgical status</b>                    | Missing              | 0.69<br>[0.53-0.89]**  | 0.81 [0.59-1.12]       | 0.78<br>[0.59-1.03]    | 0.80 [0.54-1.16]       |
|                                           | Non-surgical         | Reference              | Reference              | Reference              | Reference              |
|                                           | Preoperative         | 0.90<br>[0.83-0.96]**  | 0.82<br>[0.75-0.89]*** | 0.82<br>[0.76-0.89]*** | 0.79<br>[0.72-0.87]*** |
|                                           | Postoperative        | 1.18<br>[1.10-1.26]*** | 1.34<br>[1.24-1.45]*** | 1.31<br>[1.21-1.41]*** | 1.33<br>[1.22-1.45]*** |
|                                           | Undefined or missing | 1.21<br>[0.74-1.99]    | 0.94 [0.57-1.57]       | 0.99<br>[0.60-1.63]    | 0.81 [0.45-1.45]       |
| <b>LOS before nutritionDay</b>            | 0-6 days             | Reference              | Reference              | Reference              | Reference              |
|                                           | 7-13 days            | 0.96<br>[0.90-1.03]    | 0.99 [0.92-1.07]       | 0.99<br>[0.92-1.07]    | 0.98 [0.91-1.07]       |
|                                           | 14-20 days           | 0.87<br>[0.79-0.96]**  | 0.95 [0.85-1.06]       | 0.94<br>[0.85-1.05]    | 0.97 [0.86-1.09]       |
|                                           | ≥ 21 days            | 0.51<br>[0.46-0.57]*** | 0.62<br>[0.55-0.69]*** | 0.62<br>[0.55-0.69]*** | 0.62<br>[0.55-0.71]*** |
|                                           | Missing              | 1.03<br>[0.93-1.15]    | 0.81 [0.68-0.96]*      | 0.82<br>[0.69-0.97]*   | 0.86 [0.72-1.02]       |
| <b>Number of drugs before admission</b>   | None                 | Reference              | Reference              | Reference              | Reference              |
|                                           | 1-2                  | 0.93<br>[0.87-1.00]*   | 1.03 [0.95-1.11]       | 1.00<br>[0.93-1.07]    | 1.03 [0.95-1.11]       |
|                                           | 3-5                  | 0.95<br>[0.88-1.03]    | 1.08 [0.99-1.17]       | 1.05<br>[0.96-1.14]    | 1.09 [1.00-1.20]       |
|                                           | > 5                  | 0.75<br>[0.68-0.83]*** | 1.01 [0.90-1.13]       | 0.95<br>[0.85-1.06]    | 0.96 [0.85-1.08]       |
|                                           | Unknown or missing   | 0.76<br>[0.67-0.86]*** | 1.02 [0.89-1.17]       | 0.95<br>[0.83-1.08]    | 0.97 [0.83-1.13]       |
| <b>Weight change within last 3 months</b> | Stable weight        | Reference              | Reference              |                        |                        |
|                                           | Weight loss          | 0.80<br>[0.75-0.85]*** | 0.94 [0.87-1.00]       |                        |                        |
|                                           | Weight gain          | 0.99<br>[0.88-1.12]    | 1.02 [0.90-1.16]       |                        |                        |
|                                           | Unsure or missing    | 0.80<br>[0.73-0.88]*** | 0.87 [0.78-0.96]**     |                        |                        |

|                                                                  |                                                      |                        |                        |                        |
|------------------------------------------------------------------|------------------------------------------------------|------------------------|------------------------|------------------------|
| <b>Food intake<br/>in the<br/>previous<br/>week</b>              | More than<br>normal or<br>normal                     | Reference              | Reference              |                        |
|                                                                  | A little less<br>than normal                         | 0.89<br>[0.82-0.97]**  | 0.94 [0.86-1.03]       |                        |
|                                                                  | Less than half<br>of normal                          | 0.75<br>[0.70-0.81]*** | 0.87 [0.80-0.95]**     |                        |
|                                                                  | Missing                                              | 0.85<br>[0.68-1.06]    | 1.03 [0.78-1.36]       |                        |
|                                                                  |                                                      |                        |                        |                        |
| <b>Eating on<br/>nutritionDay</b>                                | About all                                            | Reference              | Reference              |                        |
|                                                                  |                                                      | 1.04                   | 1.09                   |                        |
|                                                                  | 1/2                                                  | [0.97-1.12]            | [1.00-1.18]*           |                        |
|                                                                  |                                                      | 0.92                   |                        |                        |
|                                                                  | 1/4                                                  | [0.83-1.02]            | 1.05 [0.94-1.18]       |                        |
| <b>Dietary<br/>provision</b>                                     |                                                      | 0.82                   |                        |                        |
|                                                                  | Nothing                                              | [0.76-0.87]***         | 0.94 [0.86-1.02]       |                        |
|                                                                  |                                                      | 0.75                   |                        |                        |
|                                                                  | Missing                                              | [0.65-0.86]***         | 0.99 [0.83-1.18]       |                        |
|                                                                  |                                                      |                        |                        |                        |
| <b>Malnutrition<br/>defined by<br/>GLIM</b>                      | No food/diet                                         | Reference              | Reference              | Reference              |
|                                                                  |                                                      | 1.55                   | 1.47                   | 1.49                   |
|                                                                  | Food/diet                                            | [1.45-1.66]***         | [1.35-1.60]***         | [1.38-1.61]***         |
|                                                                  | Multi-form of<br>food and<br>artificial<br>nutrition | 1.39<br>[1.26-1.54]*** | 1.26<br>[1.13-1.41]*** | 1.29<br>[1.16-1.43]*** |
|                                                                  | Unsure or<br>missing                                 | 1.41<br>[1.28-1.57]*** | 1.43<br>[1.28-1.60]*** | 1.44<br>[1.29-1.61]*** |
| <b>Malnutrition<br/>diagnosis<br/>with dietary<br/>provision</b> |                                                      |                        |                        |                        |
|                                                                  | No                                                   |                        | Reference              |                        |
|                                                                  |                                                      |                        | 0.83                   |                        |
|                                                                  | Yes                                                  |                        | [0.77-0.89]***         |                        |
|                                                                  |                                                      |                        | 0.97                   |                        |
| <b>Malnutrition<br/>diagnosis<br/>with dietary<br/>provision</b> | Undefined                                            |                        | [0.88-1.08]            |                        |
|                                                                  | Malnutrition<br>without<br>food/diet                 |                        | Reference              |                        |
|                                                                  |                                                      |                        | 1.58                   |                        |
|                                                                  | Malnutrition<br>with food/diet                       |                        | [1.36-1.83]***         |                        |
|                                                                  |                                                      |                        |                        |                        |

|                                                                                  |                       |
|----------------------------------------------------------------------------------|-----------------------|
| Malnutrition<br>with<br>multi-form of<br>food and<br>nutritional<br>support      | 1.34<br>[1.11-1.63]** |
| Non-malnutriti<br>on without<br>food/diet                                        | 1.29<br>[1.13-1.46]** |
| Non-malnutriti<br>on with<br>food/diet                                           | 1.86<br>[1.64-2.11]** |
| Non-malnutriti<br>on with<br>multi-form of<br>food and<br>nutritional<br>support | 1.56<br>[1.33-1.81]** |

---

Model I : Multivariable analysis with individual variables included in nutritionDay questionnaires. Model II: GLIM added to multivariable analysis without defined variables including of BMI, age, weight change within last 3 months, major lesion types, food intake in the previous week, eaten on nutritionDay and comorbidity. Model III: Malnutrition diagnosis defined by GLIM with dietary provision added to multivariable analysis. All data are presented as HR and 95% CI. \*  $p < 0.05$ , \*\*  $p < 0.01$ , \*\*\*  $p < 0.001$ . HR, hazard ratio; CI, confidence interval; BMI, body mass index; LOS, length of stay in hospital; GLIM, Global Leadership Initiative on Malnutrition.
