# Supplementary material for: Dietary Provision, GLIM-Defined Malnutrition and Their Association with Clinical Outcome: Results from the First Decade of nutritionDay in China
Source: MDPI journal article supplement (doi:10.3390/nu16040569), 2024-02-19
Supplement: s1 [file s1]

Supplementary Table S4. Demographic characteristics in malnourished patients and non-malnourished patients,  $n = 5821$ .

| Variables                          | All patients<br>$n$ (%) | Non-malnourished patients<br>$n$ (%) | Malnourished patients<br>$n$ (%) | $P$ value |
|------------------------------------|-------------------------|--------------------------------------|----------------------------------|-----------|
|                                    | 5821                    | 3962                                 | 1328                             |           |
| Sex                                |                         |                                      |                                  | 0.35      |
| Female                             | 2352 (40.4%)            | 1590 (40.1%)                         | 564 (42.5%)                      |           |
| Male                               | 3461 (59.5%)            | 2366 (59.7%)                         | 762 (57.4%)                      |           |
| Missing                            | 8 (0.1%)                | 6 (0.2%)                             | 2 (0.2%)                         |           |
| Age                                |                         |                                      |                                  | < 0.001   |
| 18-29 years                        | 451 (7.7%)              | 282 (7.1%)                           | 148 (11.1%)                      |           |
| 30-39 years                        | 583 (10.0%)             | 415 (10.5%)                          | 127 (9.6%)                       |           |
| 40-49 years                        | 844 (14.5%)             | 608 (15.3%)                          | 169 (12.7%)                      |           |
| 50-59 years                        | 1269 (21.8%)            | 924 (23.3%)                          | 233 (17.5%)                      |           |
| 60-69 years                        | 1505 (25.9%)            | 1050 (26.5%)                         | 318 (23.9%)                      |           |
| 70-79 years                        | 850 (14.6%)             | 516 (13.0%)                          | 226 (17.0%)                      |           |
| $\geq 80$ years                    | 319 (5.5%)              | 167 (4.2%)                           | 107 (8.1%)                       |           |
| BMI                                |                         |                                      |                                  | 0.009     |
| 18.5-24.9                          | 3472 (59.6%)            | 2554 (64.5%)                         | 611 (46.0%)                      |           |
| < 18.5                             | 710 (12.2%)             | 121 (3.1%)                           | 589 (44.4%)                      |           |
| 25.0-29.9                          | 1381 (23.7%)            | 1128 (28.5%)                         | 115 (8.7%)                       |           |
| $\geq 30.0$                        | 184 (3.2%)              | 159 (4.0%)                           | 12 (0.9%)                        |           |
| Missing                            | 74 (1.3%)               | 0 (0.0%)                             | 1 (0.1%)                         |           |
| Surgical status                    |                         |                                      |                                  | < 0.001   |
| Non-surgical                       | 2704 (46.5%)            | 1717 (43.3%)                         | 715 (53.8%)                      |           |
| Preoperative                       | 1286 (22.1%)            | 953 (24.1%)                          | 217 (16.3%)                      |           |
| Postoperative                      | 1797 (30.9%)            | 1273 (32.1%)                         | 389 (29.3%)                      |           |
| Undefined or missing               | 34 (0.6%)               | 19 (0.5%)                            | 7 (0.5%)                         |           |
| Weight change within last 3 months |                         |                                      |                                  | < 0.001   |
| Stable weight                      | 2607 (44.8%)            | 2356 (59.5%)                         | 218 (16.4%)                      |           |
| Weight loss                        | 2246 (38.6%)            | 1129 (28.5%)                         | 1010 (76.1%)                     |           |
| Weight gain                        | 340 (5.8%)              | 310 (7.8%)                           | 29 (2.2%)                        |           |
| Unsure or missing                  | 628 (10.8%)             | 167 (4.2%)                           | 71 (5.4%)                        |           |
| Dietary provision                  |                         |                                      |                                  | < 0.001   |

|                                                      |              |              |              |         |
|------------------------------------------------------|--------------|--------------|--------------|---------|
| No food/diet                                         | 1541 (26.5%) | 871 (22.0%)  | 554 (41.7%)  |         |
| Food/diet                                            | 3015 (51.8%) | 2249 (56.8%) | 455 (34.3%)  |         |
| Multi-form<br>of food and<br>artificial<br>nutrition | 613 (10.5%)  | 388 (9.8%)   | 185 (13.9%)  |         |
| Unsure or<br>missing                                 | 652 (11.2%)  | 454 (11.5%)  | 134 (10.1%)  |         |
| Food intake<br>in the<br>previous<br>week            |              |              |              | < 0.001 |
| More than<br>normal or<br>normal                     | 3825 (65.7%) | 2968 (74.9%) | 513 (38.6%)  |         |
| A little less<br>than normal                         | 726 (12.5%)  | 435 (11.0%)  | 241 (18.1%)  |         |
| Less than half<br>of normal                          | 1152 (19.8%) | 506 (12.8%)  | 554 (41.7%)  |         |
| Missing                                              | 118 (2.0%)   | 53 (1.3%)    | 20 (1.5%)    |         |
| Eating on<br>nutritionDay                            | 276 (4.7%)   | 153 (3.9%)   | 62 (4.7%)    | < 0.001 |
| About all                                            | 2173 (37.3%) | 1760 (44.4%) | 224 (16.9%)  |         |
| 1/2                                                  | 1176 (20.2%) | 833 (21.0%)  | 235 (17.7%)  |         |
| 1/4                                                  | 558 (9.6%)   | 294 (7.4%)   | 216 (16.3%)  |         |
| Nothing                                              | 1638 (28.1%) | 922 (23.3%)  | 591 (44.5%)  |         |
| Missing                                              | 276 (4.7%)   | 153 (3.9%)   | 62 (4.7%)    |         |
| 30-day<br>outcomes                                   |              |              |              | < 0.001 |
| Poor<br>outcome                                      | 675 (11.6%)  | 375 (9.5%)   | 257 (19.4%)  |         |
| Good<br>outcome                                      | 5093 (87.5%) | 3552 (89.7%) | 1061 (79.9%) |         |
| Missing                                              | 53 (0.9%)    | 35 (0.9%)    | 10 (0.8%)    |         |

*P* value, non-malnourished patients vs. malnourished patients. Missing data were excluded.  
 BMI, body mass index
