# Supplementary material for: Dietary Provision, GLIM-Defined Malnutrition and Their Association with Clinical Outcome: Results from the First Decade of nutritionDay in China
Source: MDPI journal article supplement (doi:10.3390/nu16040569), 2024-02-19
Supplement: s1 [file s1]

Supplementary Table S2. Variables and median LOS after nutritionDay in patients between 30-day poor outcome and good outcome,  $n = 5821$ .

| Variables                          | LOS<br>after<br>nutritionDay survey,<br>days,<br>median [Q1; Q3] | Poor outcome<br>$n$ (%) | Good outcome<br>$n$ (%) | $P$ value |
|------------------------------------|------------------------------------------------------------------|-------------------------|-------------------------|-----------|
| Hospital Location                  | 6.0 [3.0; 12.0]                                                  | 675                     | 5093                    | < 0.001   |
| Eastern China                      | 6.0 [3.0; 12.0]                                                  | 553 (81.9%)             | 3626 (71.2%)            |           |
| Southern China                     | 6.0 [4.0; 11.0]                                                  | 18 (2.7%)               | 88 (1.7%)               |           |
| Northern China                     | 6.0 [4.0; 11.0]                                                  | 97 (14.4%)              | 947 (18.6%)             |           |
| Northwestern China                 | 4.0 [1.0; 7.0]                                                   | 7 (1.0%)                | 432 (8.5%)              | < 0.001   |
| Department                         |                                                                  |                         |                         |           |
| General surgery                    | 6.0 [3.0; 12.0]                                                  | 352 (52.1%)             | 2273 (44.6%)            |           |
| Orthopedics                        | 8.0 [4.0; 13.0]                                                  | 18 (2.7%)               | 127 (2.5%)              |           |
| Urological surgical                | 5.0 [2.0; 8.0]                                                   | 1 (0.1%)                | 75 (1.5%)               |           |
| Neurosurgery                       | 9.0 [5.0; 18.0]                                                  | 50 (7.4%)               | 272 (5.3%)              |           |
| Gastroenterology<br>and hepatology | 5.0 [2.0; 9.0]                                                   | 62 (9.2%)               | 920 (18.1%)             |           |
| Respiratory<br>Medicine            | 6.0 [3.0; 11.0]                                                  | 6 (0.9%)                | 60 (1.2%)               |           |
| Oncology                           | 6.0 [3.0; 11.0]                                                  | 95 (14.1%)              | 605 (11.9%)             |           |
| Neurology                          | 6.0 [4.0; 12.0]                                                  | 15 (2.2%)               | 180 (3.5%)              |           |
| Geriatrics                         | 11.0 [6.0; 19.0]                                                 | 15 (2.2%)               | 48 (0.9%)               |           |
| Cardiothoracic<br>surgery          | 8.0 [4.0; 13.0]                                                  | 15 (2.2%)               | 175 (3.4%)              |           |
| Nephrology                         | 5.0 [1.0; 9.0]                                                   | 24 (3.6%)               | 236 (4.6%)              |           |
| Others <sup>a</sup>                | 7.0 [4.0; 13.0]                                                  | 22 (3.3%)               | 122 (2.4%)              |           |
| Sex                                |                                                                  |                         |                         | 0.070     |
| Female                             | 6.0 [3.0; 12.0]                                                  | 251 (37.2%)             | 2079 (40.8%)            |           |
| Male                               | 6.0 [3.0; 12.0]                                                  | 422 (62.5%)             | 3008 (59.1%)            |           |
| Missing                            | 4.0 [2.5; 7.5]                                                   | 2 (0.3%)                | 6 (0.1%)                |           |
| Age                                |                                                                  |                         |                         | < 0.01    |
| 18-29 years                        | 5.0 [2.0; 12.0]                                                  | 62 (9.2%)               | 385 (7.6%)              |           |
| 30-39 years                        | 6.0 [3.0; 12.0]                                                  | 90 (13.3%)              | 488 (9.6%)              |           |
| 40-49 years                        | 6.0 [3.0; 11.0]                                                  | 92 (13.6%)              | 747 (14.7%)             |           |
| 50-59 years                        | 6.0 [3.0; 12.0]                                                  | 124 (18.4%)             | 1139 (22.4%)            |           |
| 60-69 years                        | 6.0 [3.0; 11.0]                                                  | 162 (24.0%)             | 1319 (25.9%)            |           |
| 70-79 years                        | 6.0 [3.0; 12.0]                                                  | 101 (15.0%)             | 745 (14.6%)             |           |
| ≥ 80 years                         | 7.0 [4.0; 12.0]                                                  | 44 (6.5%)               | 270 (5.3%)              |           |
| BMI                                |                                                                  |                         |                         | < 0.001   |
| 18.5-24.9                          | 6.0 [3.0; 12.0]                                                  | 382 (56.6%)             | 3066 (60.2%)            |           |
| < 18.5                             | 7.0 [3.0; 13.0]                                                  | 146 (21.6%)             | 560 (11.0%)             |           |
| 25.0-29.9                          | 5.0 [2.0; 11.0]                                                  | 124 (18.4%)             | 1237 (24.3%)            |           |

|                                  |                 |             |              |         |
|----------------------------------|-----------------|-------------|--------------|---------|
| ≥ 30.0                           | 5.0 [3.0; 11.0] | 17 (2.5%)   | 164 (3.2%)   |         |
| Missing                          | 5.0 [2.0; 8.0]  | 6 (0.9%)    | 66 (1.3%)    |         |
| LOS before nutritionDay          |                 |             |              | < 0.001 |
| 0-6 days                         | 6.0 [3.0; 11.0] | 233 (34.5%) | 2577 (50.6%) |         |
| 7-13 days                        | 6.0 [2.0; 11.0] | 159 (23.6%) | 1233 (24.2%) |         |
| 14-20 days                       | 6.0 [3.0; 12.5] | 78 (11.6%)  | 471 (9.2%)   |         |
| ≥ 21 days                        | 8.0 [4.0; 17.0] | 163 (24.1%) | 403 (7.9%)   |         |
| Missing                          | 5.0 [3.0; 9.0]  | 42 (6.2%)   | 409 (8.0%)   |         |
| Ever stayed in ICU               |                 |             |              | < 0.001 |
| No                               | 6.0 [3.0; 11.0] | 556 (82.4%) | 4279 (84.0%) |         |
| Yes                              | 6.0 [3.0; 13.0] | 116 (17.2%) | 695 (13.6%)  |         |
| Missing                          | 8.0 [4.0; 13.0] | 3 (0.4%)    | 119 (2.3%)   |         |
| End-stage disease                |                 |             |              | 0.104   |
| No                               | 6.0 [3.0; 12.0] | 578 (85.6%) | 4337 (85.2%) |         |
| Yes                              | 5.0 [2.0; 11.0] | 40 (5.9%)   | 231 (4.5%)   |         |
| Unknown or missing               | 6.0 [2.3; 12.0] | 57 (8.4%)   | 525 (10.3%)  |         |
| Mobility                         |                 |             |              | < 0.001 |
| Walk without assistance          | 6.0 [2.0; 11.0] | 407 (60.3%) | 3800 (74.6%) |         |
| Walk with assistance             | 7.0 [4.0; 13.0] | 132 (19.6%) | 689 (13.5%)  |         |
| Bedridden                        | 7.0 [4.0; 13.0] | 113 (16.7%) | 333 (6.5%)   |         |
| Missing                          | 6.0 [3.0; 12.0] | 23 (3.4%)   | 271 (5.3%)   |         |
| Self-rated health                |                 |             |              | < 0.001 |
| Excellent and very good          | 5.0 [2.5; 11.0] | 42 (6.2%)   | 400 (7.9%)   |         |
| Good                             | 5.0 [2.0; 11.0] | 156 (23.1%) | 1677 (32.9%) |         |
| Fair                             | 6.0 [3.0; 12.0] | 358 (53.0%) | 2337 (45.9%) |         |
| Poor and very poor               | 7.0 [4.0; 13.0] | 111 (16.4%) | 603 (11.8%)  |         |
| Missing                          | 8.0 [4.0; 16.0] | 8 (1.2%)    | 76 (1.5%)    |         |
| Food intake in the previous week |                 |             |              | < 0.001 |
| More than normal or normal       | 6.0 [3.0; 11.0] | 369 (54.7%) | 3430 (67.3%) |         |
| A little less than normal        | 6.0 [3.0; 12.0] | 81 (12.0%)  | 641 (12.6%)  |         |
| Less than half of normal         | 6.0 [3.0; 13.0] | 215 (31.9%) | 926 (18.2%)  |         |
| Missing                          | 7.0 [4.0; 14.0] | 10 (1.5%)   | 96 (1.9%)    |         |
| Eating on nutritionDay           |                 |             |              | < 0.001 |
| About all                        | 6.0 [3.0; 12.0] | 183 (27.1%) | 1977 (38.8%) |         |
| 1/2                              | 5.0 [2.0; 10.0] | 110 (16.3%) | 1061 (20.8%) |         |
| 1/4                              | 5.0 [2.0; 10.0] | 96 (14.2%)  | 456 (9.0%)   |         |

|                                                   |                 |             |              |         |
|---------------------------------------------------|-----------------|-------------|--------------|---------|
| Nothing                                           | 6.0 [4.0; 12.0] | 254 (37.6%) | 1367 (26.8%) |         |
| Missing                                           | 7.0 [4.0; 14.0] | 32 (4.7%)   | 232 (4.6%)   |         |
| Number of drugs<br>before admission               |                 |             |              | < 0.001 |
| None                                              | 5.0 [2.0; 11.0] | 165 (24.4%) | 1565 (30.7%) |         |
| 1-2                                               | 6.0 [3.0; 12.0] | 211 (31.3%) | 1611 (31.6%) |         |
| 3-5                                               | 6.0 [3.0; 11.0] | 125 (18.5%) | 1046 (20.5%) |         |
| > 5                                               | 6.0 [4.0; 13.0] | 109 (16.1%) | 531 (10.4%)  |         |
| Unknown or missing                                | 6.5 [3.0; 13.0] | 65 (9.6%)   | 340 (6.7%)   |         |
| Major lesion types                                |                 |             |              | < 0.001 |
| Cancer                                            | 6.0 [3.0; 12.0] | 190 (28.1%) | 1266 (24.9%) |         |
| Neurological<br>disease                           | 8.0 [4.0; 14.0] | 51 (7.6%)   | 339 (6.7%)   |         |
| Digestive disease                                 | 5.0 [2.0; 11.0] | 258 (38.2%) | 1971 (38.7%) |         |
| Endocrine/nutrition<br>al/metabolic disease       | 5.0 [4.0; 14.0] | 15 (2.2%)   | 100 (2.0%)   |         |
| Cardiovascular<br>disease                         | 7.0 [3.0; 13.0] | 25 (3.7%)   | 161 (3.2%)   |         |
| Respiratory disease                               | 6.0 [3.0; 10.3] | 16 (2.4%)   | 130 (2.6%)   |         |
| Genitourinary<br>disease                          | 5.0 [2.0; 11.0] | 27 (4.0%)   | 242 (4.8%)   |         |
| Other                                             | 6.0 [3.0; 13.0] | 74 (11.0%)  | 475 (9.3%)   |         |
| Missing                                           | 5.0 [2.0; 10.0] | 19 (2.8%)   | 409 (8.0%)   |         |
| Comorbidity                                       |                 |             |              | < 0.001 |
| No                                                | 5.0 [2.0; 11.0] | 186 (27.6%) | 1703 (33.4%) |         |
| Yes                                               | 6.0 [4.0; 12.0] | 466 (69.0%) | 2895 (56.8%) |         |
| Missing                                           | 5.0 [2.0; 9.3]  | 23 (3.4%)   | 495 (9.7%)   |         |
| Surgical status                                   |                 |             |              | 0.299   |
| Non-surgical                                      | 6.0 [3.0; 11.0] | 338 (50.1%) | 2350 (46.1%) |         |
| Preoperative                                      | 7.0 [4.0; 14.0] | 139 (20.6%) | 1135 (22.3%) |         |
| Postoperative                                     | 5.0 [2.0; 10.0] | 195 (28.9%) | 1578 (31.0%) |         |
| Undefined or<br>missing                           | 5.0 [4.0; 11.0] | 3 (0.4%)    | 30 (0.6%)    |         |
| Dietary provision                                 |                 |             |              | < 0.001 |
| No food/diet                                      | 7.0 [4.0; 14.0] | 292 (43.3%) | 1236 (24.3%) |         |
| Food/diet                                         | 5.0 [2.0; 11.0] | 253 (37.5%) | 2748 (54.0%) |         |
| Multi-form of food<br>and artificial<br>nutrition | 6.0 [3.0; 11.0] | 57 (8.4%)   | 542 (10.6%)  |         |
| Unsure or missing                                 | 6.0 [3.0; 11.0] | 73 (10.8%)  | 567 (11.1%)  |         |
| Weight change<br>within last 3 months             |                 |             |              | < 0.001 |
| Stable weight                                     | 5.0 [2.0; 11.0] | 244 (36.1%) | 2343 (46.0%) |         |
| Weight loss                                       | 6.0 [3.0; 12.0] | 326 (48.3%) | 1906 (37.4%) |         |

|                                               |                 |             |              |         |
|-----------------------------------------------|-----------------|-------------|--------------|---------|
| Weight gain                                   | 5.0 [2.0; 9.0]  | 39 (5.8%)   | 300 (5.9%)   |         |
| Unsure or missing                             | 7.0 [4.0; 14.0] | 66 (9.8%)   | 544 (10.7%)  |         |
| At risk of<br>malnutrition defined<br>by MUST |                 |             |              | < 0.001 |
| No                                            | 5.5 [3.0; 11.0] | 312 (46.2%) | 3023 (59.4%) |         |
| Yes                                           | 6.0 [3.0; 13.0] | 320 (47.4%) | 1590 (31.2%) |         |
| Undefined                                     | 6.0 [3.0; 13.0] | 43 (6.4%)   | 480 (9.4%)   |         |
| Malnutrition defined<br>by GLIM               |                 |             |              | < 0.001 |
| No                                            | 6.0 [3.0; 11.0] | 375 (55.6%) | 3552 (69.7%) |         |
| Yes                                           | 7.0 [4.0; 13.0] | 257 (38.1%) | 1061 (20.8%) |         |
| Undefined                                     | 6.0 [3.0; 13.0] | 43 (6.4%)   | 480 (9.4%)   |         |

<sup>a</sup> Others includes endocrinology, emergency, burn surgery, otolaryngology, internal medicine, stomatology and trauma departments which with fewer than 60 patients.

Values were presented as Median [Q1; Q3] or *n* (%); *P* value, poor outcome group vs. good outcome group. Missing data were excluded. LOS, length of stay in hospital; BMI, body mass index; ICU, intensive care unit; MUST, Malnutrition Universal Screening Tool; GLIM, Global Leadership Initiative on Malnutrition.
